# Supplementary material for: Molecular design of a proton-induced molecular switch based on rod-shaped Ru dinuclear complexes with bis-tridentate 2,6-bis(benzimidazol-2-yl)pyridine derivatives
Source: Royal Society of Chemistry journal article supplement (doi:10.1039/b300130j), 2003-01-01
Supplement: b300130j.doc [file b300130j.doc]

**Supporting Information**

Fig. S1. Observed and calculated isotope patterns of ESI mass spectra for the [M-4PF6 – 2H+]2+ ion of the Ru dinuclear complexes, [Ru2(terpy)2(H4Ln)] (a) n = 1 and (b) n =2 in dmf/methanol.

Fig. S2. Molecular orbitals of HOMO and LUMO for bridging ligands H4L0 and H4L2 calculated by use of SparatanTM software.

Figure S1

(a)

Calcd.

Obsd.

(b)

Calcd.

Obsd.

Figure S2

H4L0

H4L2


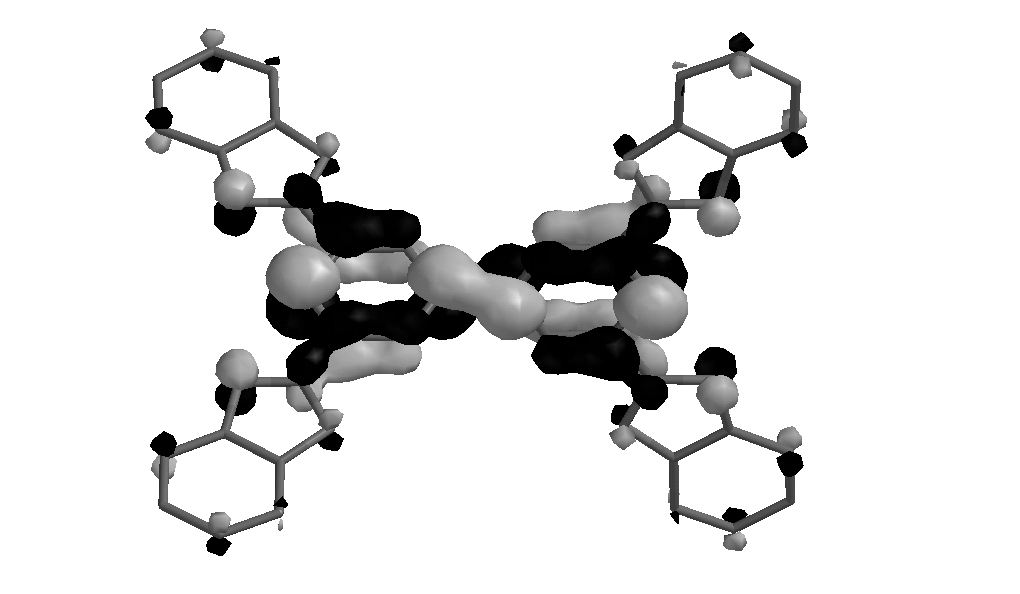

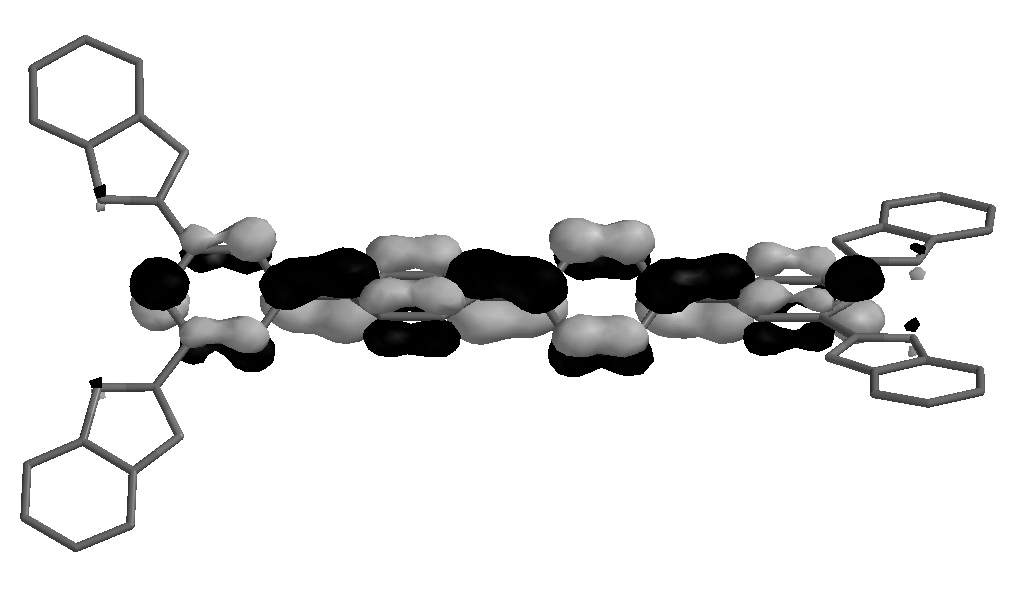


LUMO+2(164 th)

LUMO(202 th)


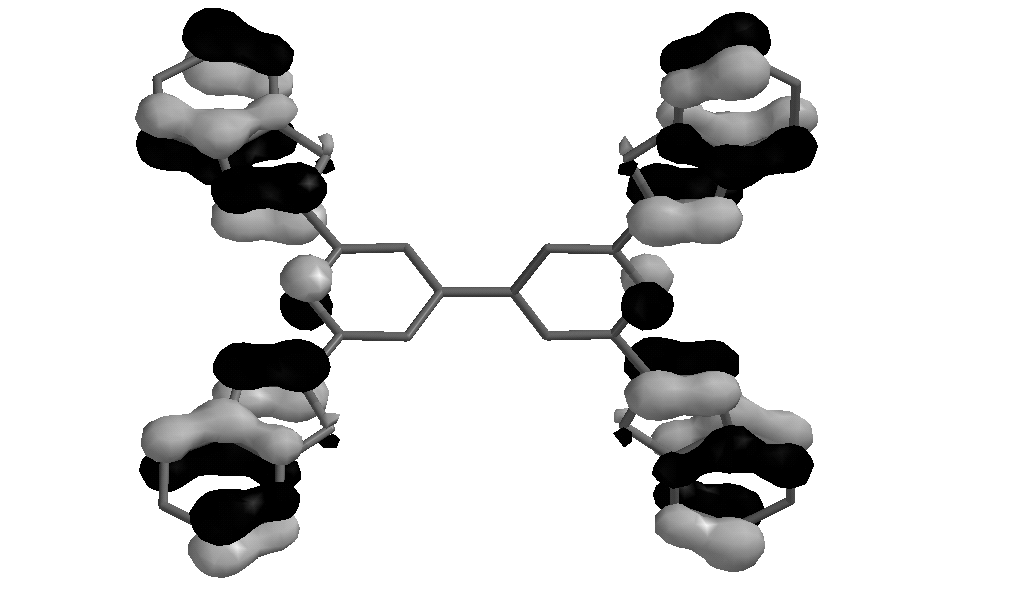

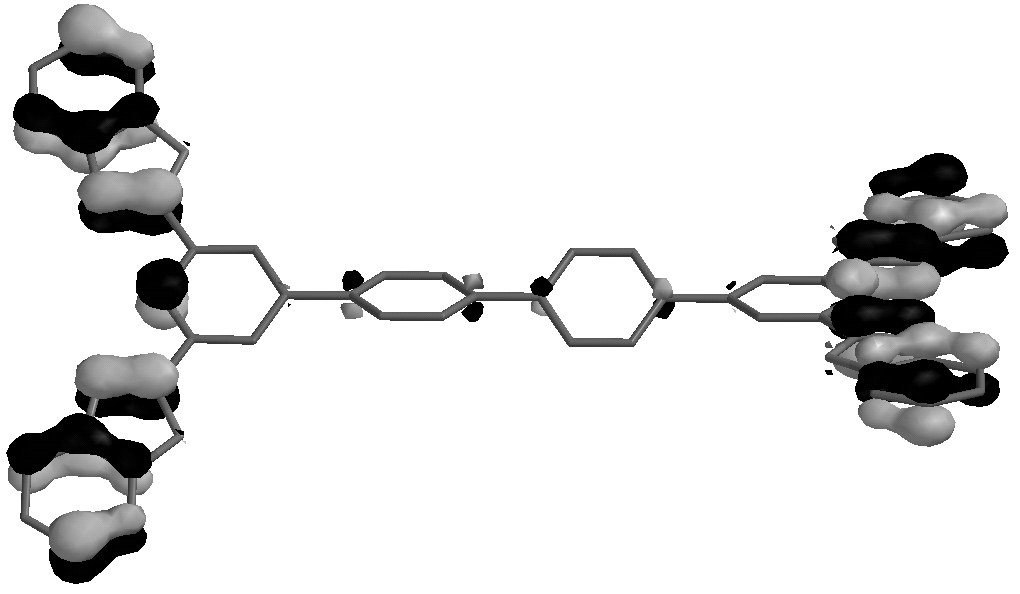


HOMO-2(159 th)

HOMO-2(199 th)
