# Supplementary figures and images for: Molecular design of a proton-induced molecular switch based on rod-shaped Ru dinuclear complexes with bis-tridentate 2,6-bis(benzimidazol-2-yl)pyridine derivatives
Source: Royal Society of Chemistry journal article supplement (doi:10.1039/b300130j), 2003-01-01

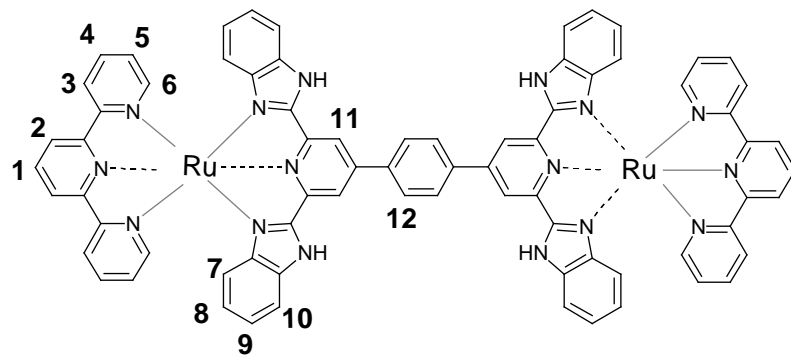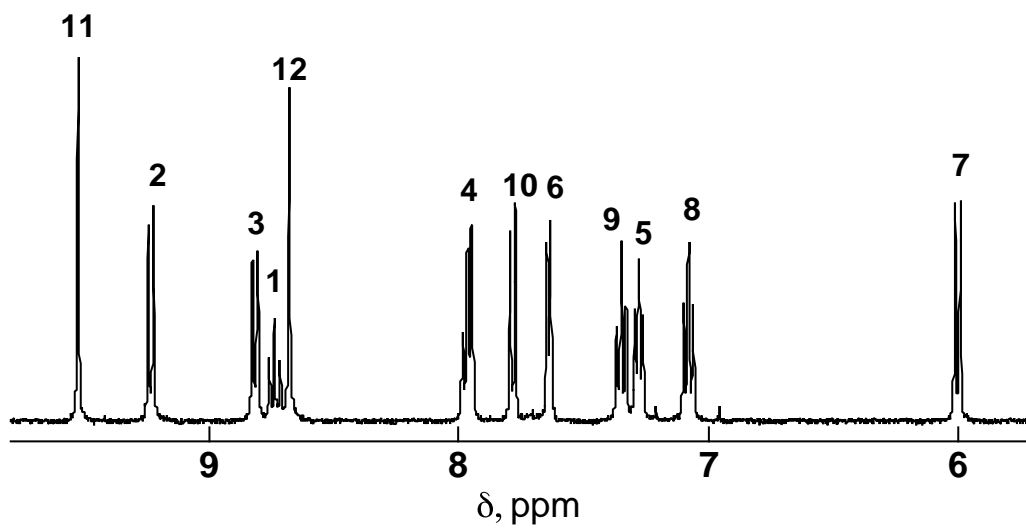

Supplement: b300130j.pdf [file b300130j.pdf]
